# Supplementary material for: Smart cities: the state-of-the-art and governance challenge
Source: Springer Nature journal article supplement (doi:10.1186/s40604-014-0007-9), 2014-11-21
Supplement: 40604_2014_7_MOESM1_ESM.pdf [file 40604_2014_7_MOESM1_ESM.pdf]

## **Multilingual abstracts**

Smart Cities: the state-of-the-art and governance challenge  
Mark Deakin

### **Spanish**

Ciudades inteligentes: estado del arte y reto de gobernanza

#### Resumen

Reflexionando sobre la gobernanza de las ciudades inteligentes, el estado del arte que este artículo propone ofrece una crítica de recientes consideraciones sobre su desarrollo teniendo en cuenta la clasificación de ciudades y el internet del futuro. A partir de estas reflexiones críticas, explica las ciudades inteligentes en términos de redes sociales, atributos culturales y capacidades medioambientales en relación con las ecologías vitales del capital intelectual, la creación de riqueza y los estándares de gobernanza participativa que regulan su desarrollo. El modelo de Triple Hélice que el artículo define sugiere, asimismo, que las ciudades son inteligentes cuando las TIC de futuras evoluciones de internet se integran con éxito en las redes que la sociedad necesita no solo para generar capital intelectual o crear riqueza, sino para cultivar la capacidad medioambiental, ecología y vitalidad de esos espacios que la democracia directa de su gobernanza participativa libera, añade valor y construye.

### **French**

Les villes intelligentes : état de la question et défis de gouvernance

#### Résumé

L'état de la question proposé par cet article à propos de la gouvernance des villes intelligentes, présente une critique des considérations récentes sur leur développement en termes de classification et d'internet du futur. Partant de ces considérations critiques, il analyse les villes intelligentes en termes de réseaux sociaux, d'attributs culturels et de capacités environnementales, vis-à-vis les écologies vitales de capital intellectuel, de création de richesses et de standards de gouvernance participative qui régulent leur développement. Le modèle de Triple Hélice que l'article met en avant pour expliquer ces performances suggère que les villes sont intelligentes quand les TICs permettant le développement de l'internet du futur réussissent à intégrer les réseaux dont la société a besoin non seulement pour générer du capital intellectuel ou créer de la richesse, mais aussi pour cultiver la capacité environnementale, l'écologie et la vitalité de ces espaces que la démocratie directe de la gouvernance participative libère, auxquels elle donne de la valeur ajoutée et qu'elle construit.

## Russian

### Умные Города: современное состояние и проблемы управления

#### Абстракт

Размышляя о современном состоянии и проблемах управления «умными» городами, в данной работе предложен критический анализ недавнего рейтинга городов. Вооружившись аналитическими наработками, статья объясняет устройство умных городов в условия социальных сетей, культурных атрибутов и экологических мощностей, соперничающих с жизненно важными экологиями интеллектуального капитала, созданием богатства и стандартов регулирования, управляющих их развитием. Применяв модель тройной спирали для анализа, в статье предположено, что города умны, когда информационно-коммуникационные технологии будущих интернет-разработок успешно внедряют сети, в которых нуждается общество, чтобы не только генерировать интеллектуальный капитал, или создать богатство, но также культивировать экологическую емкость, экологию и жизненность этих пространств.

## Chinese

### 智慧城市：现状和治理的挑战

#### 摘要：

通过反思智慧城市的现状和治理，这篇论文首先对最近的城市排名和《未来互联网》期刊（*Future Internet*）给予批判。然后基于这些重要的见解，利用社会网络、文化属性和环境容量等概念解释智慧城市，直面智力资本、财富创造和规范它们发展的参与性治理标准的生态活力。在这篇论文里用于进一步解释这些表现（performances）的三螺旋模式反过来指明：当未来互联网发展的信息通信技术（ICTs）成功地嵌入网络社会需要的时候，城市是智慧的。因为他们不仅生成智力资本，或创造财富，而且培育环境容量、生态以及它们的参与性治理的直接民主所开放、增值和构建的那些空间的活力。

## Arabic

### المدن الذكيّة: مستوى المعارف وتحديات الحوكمة

#### ملخص

في إطار التفكير في حوكمة المدن الذكيّة، تقدّم هذه الورقة نقد لتصنيفها الذي صدر مؤخراً و لكيفية تنميتها في المستقبل عبر شبكة الإنترنت. بالاستناد إلى هذه الجوانب النقديّة، تفسّر هذه الورقة ذكاء المدن بواسطة الشبكات الاجتماعيّة والخصائص الثقافيّة والقدرات البيئيّة، المنافسة والمنافسة، الايكولوجيّة الحيويّة لرأس المال الفكري، وخلق الثروة ومعايير الحوكمة القائمة على التشاركيّة لتنظيم تنميتها. وتقدّم هذه الورقة أنموذج "المراوح الثلاثة" لتفسير مردود هذه المدن. في المقابل تبين أنّ هذه المدن لا يمكن أن تكون " ذكيّة" إلا إذا كانت التطوّرات المستقبلية لتكنولوجيات المعلومات

والأصلالات في شبكة الإنترنت تفي بحاجيات الشبكات الاجتماعية ولا تقتصر على خلق الرأس المال الفكري أو خلق الثروة، بل تتعدى ذلك لاستثمار القدرة والحيوية البيئية والإكولوجية للفضاءات التي تفرزها الديمقراطية المباشرة في إطار الحوكمة التشاركية .

## Portuguese

Cidades Inteligentes: o estado da arte e o desafio da governança

Resumo:

Ao refletir sobre a governança de cidades inteligentes, o estado da arte deste artigo avança ao oferecer uma crítica a visão do desenvolvimento apresentadas no City Ranking and Future Internet. Munido com esta visão crítica, as cidades inteligentes são explicadas em termos de redes sociais, dos atributos culturais e das capacidades ambientais, vis-a-vis, as ecologias vitais geradas pelo capital intelectual, pela criação de riqueza e dos padrões de governança participativa que regulam o seu desenvolvimento. O modelo da Hélice tríplice no qual este artigo se baseia para explicar a performance destas cidades, sugere que estas são inteligentes quando o futuro da Tecnologia da Informação e da Internet incorporam com sucesso as necessidades das redes da sociedade, não somente para gerar capital intelectual, ou criação de riqueza, mas quando cultivam a capacidade ambiental, a ecologia e a vitalidade destes espaço
